# Supplementary material
Source: publisher figshare collection journal article supplement (https://acs.figshare.com/ndownloader/files/7531771)
Supplement: Supplementary file 1 [file 7531771]

## Supporting Information

# Synthesis of Mesochannel Carbon Nanowall Material from CO<sub>2</sub> and Its Excellent Performance for Perovskite Solar Cells

*Wei Wei,<sup>†</sup> Kai Sun,<sup>‡</sup> and Yun Hang Hu<sup>\*‡</sup>*

<sup>†</sup>Department of Materials Science and Engineering, Michigan Technological University, 1400  
Townsend Drive, Houghton, MI 49931-1295, USA

<sup>‡</sup>Department of Materials Science and Engineering, University of Michigan, Ann Arbor, MI,  
48109-2136, USA

\*Author to whom correspondence should be addressed. E-mail: [yunhangh@mtu.edu](mailto:yunhangh@mtu.edu)

## 1. Characterizations of CEG.

The CEG sample was subjected to structure characterization. The FESEM image reveals CEG possesses a nanoflake-structure (Figure S1a). Its XRD pattern shows two diffraction peaks at  $26.6^\circ$  and  $43.8^\circ$ , corresponding with (002) and (100) plans of graphitic carbon, respectively (Figure S1b). As shown in Figure S1c, one can see the typical Raman spectra, in which broadened D band and G band, which are associated with disorder/defects in graphene sheets, can be observed for CEG samples. The disorder/defects of the CEG samples were further proved by IR spectra, namely, C-O-C, C-OH, and C=O functional groups were observed at 1066, 1225, and 1727  $\text{cm}^{-1}$ . Those are typical characters of chemical exfoliated graphene.

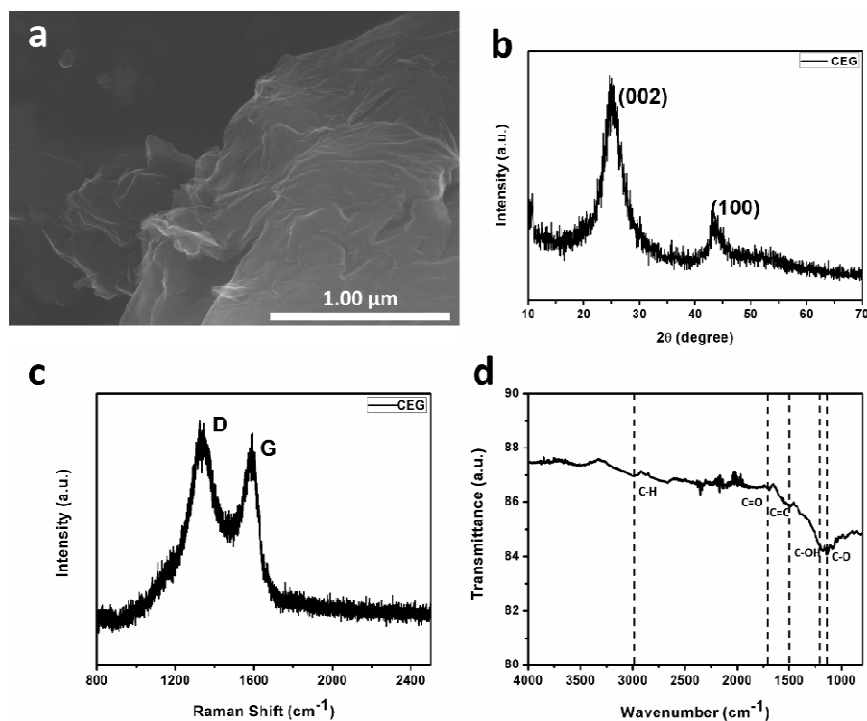

**Figure S1.** Characterization of CEG: (a) FESEM image, (b) XRD pattern, (c) Raman spectrum, and (d) FTIR pattern.
